# Supplementary material for: A facile synthesis of Te nanoparticles with binary size distribution by green chemistry
Source: Royal Society of Chemistry journal article supplement (doi:10.1039/c1nr10025d), 2011-01-01
Supplement: c1nr10025d.pdf [file c1nr10025d.pdf]

Supporting Information for

**A Facile Synthesis of Te Nanoparticles with Binary Size Distribution by Green Chemistry**

Weidong He,<sup>1, 3</sup> Alex Krejci,<sup>2, 3</sup> Junhao Lin,<sup>2, 3</sup> Max E. Osmulski,<sup>2, 3</sup> and James H. Dickerson<sup>\*, 2, 3</sup>

1. Interdisciplinary Program in Materials Science, Vanderbilt University, Nashville, Tennessee 37234-0106.
2. Department of Physics and Astronomy, Vanderbilt University, Nashville, Tennessee 37235-1807.
3. Vanderbilt Institute of Nanoscale Science and Engineering, Vanderbilt University, Nashville, Tennessee 37235.

\* Corresponding author: james.h.dickerson@vanderbilt.edu

**Experimental Section**

**Synthesis of Te Nanoparticles.** All synthetic steps were carried out in nitrogen filled, moisture free glove box at room temperature. In a typical synthesis, 3.5 mL oleic acid (OA) was dissolved in a mixture solution of 15.0 mL ethylene glycol (EG) and 4.0 mL triethanolamine (TEA) under vigorous stirring. 2.0 mL of 0.1 M solution of Na<sub>2</sub>Te in EG was added drop-wise into the vigorously stirred OA solution. The resulting black-colored Te nanoparticles were separated by centrifugation, were washed with methanol, and were stored in methanol for further eletrophoretic depositions and measurements. This procedure produced the two size distributions described in the main text: 1.5 nm and 27.5 nm Te nanoparticles. To achieve other binary size distributions, one can modify the concentration of Te precursor, or change synthetic temperatures.

**Characterization.** A Bruker Tensor 27 Fourier Transform Infrared Spectroscopy (FT-IR) was employed to measure the liganding of Te nanoparticles after cleaning. Atomic force microscope (AFM) images were collected using a Nanoscope III Atomic Force Microscope.

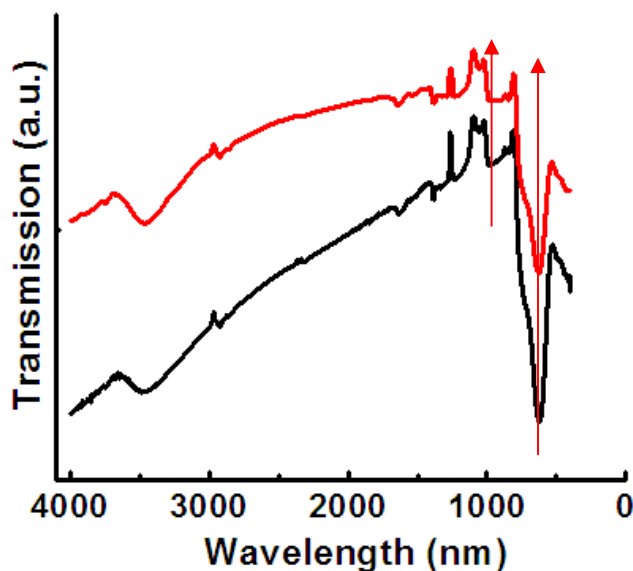

**Figure S1.** FTIR spectrum of Te nanoparticles cleaned once (black, bottom) and twice (red, top). The primary peaks correspond to triethanolamine. Peaks identification: O–H vibration,  $3500\text{--}3000\text{ cm}^{-1}$ ; C–H stretching band,  $3000\text{--}2800\text{ cm}^{-1}$ ; C–C and C–H bending,  $1460\text{--}1130\text{ cm}^{-1}$ ; C–O and C–N stretching,  $1100\text{--}890\text{ cm}^{-1}$ ; C–C–O vibrations,  $880\text{--}690\text{ cm}^{-1}$ . Physisorbed and chemisorbed water,  $3500\text{ to }3000\text{ cm}^{-1}$  and  $1800\text{--}1500\text{ cm}^{-1}$ . Red arrows demarcate the decreases in FTIR peaks.

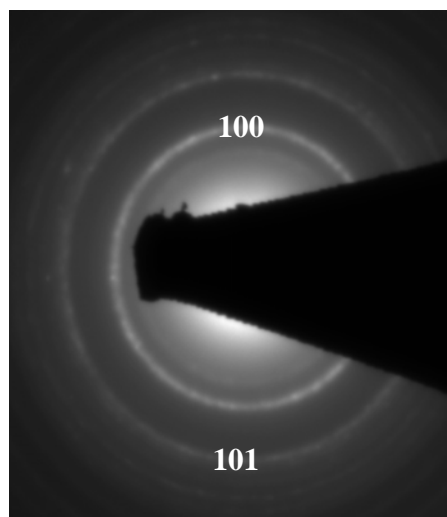

**Figure S2.** Electron diffraction pattern of as-synthesized 27.5 nm Te nanoparticles.

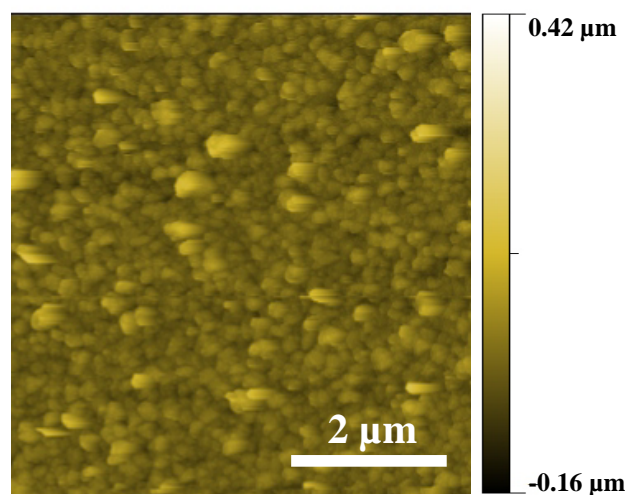

**Figure S3.** (a) 2D AFM image of 27.5 nm Te NP EPD films deposited for 20 min.

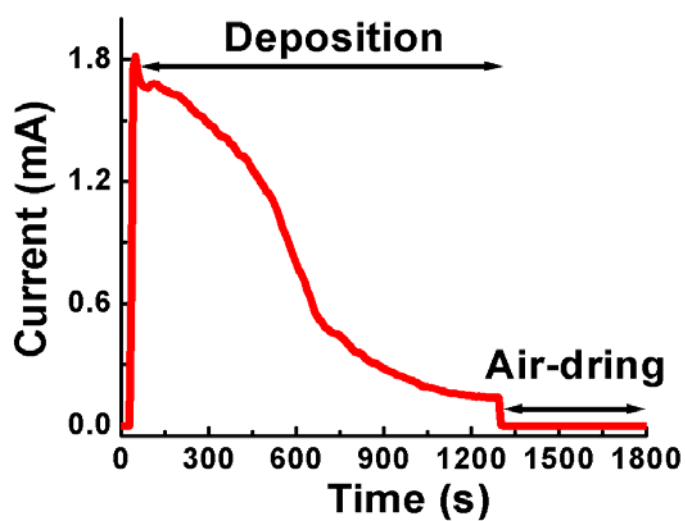

**Figure S4.** Electrophoretic deposition current versus time graph for our 27.5 nm Te nanoparticles. After approximately 22 minutes, the electrodes were extracted from the suspension and were dried in air with the applied voltage maintained.
